# Supplementary material
Source: Springer Nature journal article supplement (https://www.springermedizin.de/resource/supplementary/12902_2014_233_MOESM3_ESM.pdf/9515816)
Supplement: MOESM3 [file 9515816]

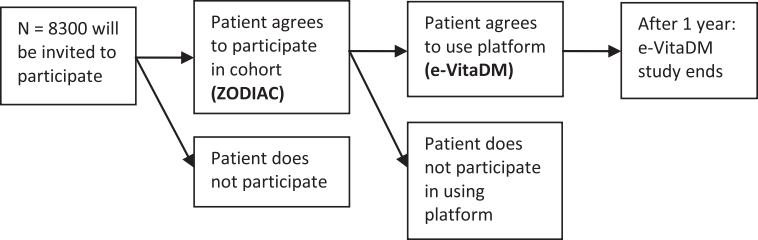

N = 8300 will be invited to participate

Patient agrees to participate in cohort **(ZODIAC)**

Patient does not participate

Patient agrees to use platform **(e-VitaDM)**

Patient does not participate in using platform

After 1 year: e-VitaDM study ends
